# Supplementary material
Source: ML conference proceedings conference paper supplement (https://openaccess.thecvf.com/content/CVPR_2019/html/Chen_Camera_Lens_Super-Resolution_CVPR_2019_paper.html)
Supplement: Supplementary file 1 [file Chen_Camera_Lens_Super-Resolution_CVPR_2019_supplemental.pdf]

# Camera Lens Super-Resolution –Supplementary Material–

Chang Chen   Zhiwei Xiong   Xinmei Tian   Zheng-Jun Zha   Feng Wu  
University of Science and Technology of China

In Sec. 1, as a supplement to the main paper, we further show the quantitative results on the five test images from the iPhone X version of City100 (Table 1). The corresponding visual results are shown in Fig. 1.

In Sec. 2, we demonstrate the favorable generalization capability of our proposed CameraSR in terms of scene content and device, as shown in Figs. 2 and 3. Specifically, the CameraSR network trained on City100 (Nikon D5500) can be readily applied to different DSLR cameras such as Canon EOS 750D and 760D.

In Sec. 3, we show an overview of the content from our City100 dataset. 100 city scenes printed in postcards are adopted as the subjects. As shown in Fig. 4, images from City100 have diverse colors and contents which facilitate leaning-based SR.

## 1. SR Results on the iPhone X Version of City100

| Test image     | Interpolated LR                | BicubicSR                      | CameraSR                       |
|----------------|--------------------------------|--------------------------------|--------------------------------|
|                | PSNR / SSIM / Ma's / VGG       | PSNR / SSIM / Ma's / VGG       | PSNR / SSIM / Ma's / VGG       |
| St. Petersburg | 25.21 / 0.8257 / 4.10 / 0.9425 | 25.20 / 0.8405 / 6.59 / 0.7199 | 26.38 / 0.8647 / 6.97 / 0.1860 |
| Dubai          | 27.15 / 0.8343 / 3.36 / 0.5326 | 27.03 / 0.8430 / 6.80 / 0.3340 | 28.68 / 0.8708 / 8.49 / 0.1344 |
| Venice         | 22.37 / 0.6542 / 3.88 / 1.1483 | 22.33 / 0.6768 / 6.77 / 0.7977 | 23.55 / 0.7188 / 6.96 / 0.3637 |
| Rome           | 26.79 / 0.8439 / 4.26 / 0.5198 | 26.91 / 0.8622 / 6.79 / 0.3856 | 29.15 / 0.8949 / 7.19 / 0.1089 |
| New York       | 21.86 / 0.7070 / 3.98 / 1.3647 | 21.98 / 0.7369 / 6.73 / 1.0750 | 23.51 / 0.7933 / 6.81 / 0.3820 |
| Average        | 24.67 / 0.7730 / 3.92 / 0.9016 | 24.69 / 0.7919 / 6.74 / 0.6624 | 26.25 / 0.8285 / 7.28 / 0.2350 |

Table 1. Quantitative SR results on the five test images from the iPhone X version of City100. PSNR and SSIM [5] (the higher, the better) are adopted for the evaluation of reconstruction accuracy (VDSR [1] network). Ma's [3] metric (the higher, the better) and VGG [4, 6] metric (the lower, the better) are adopted for the evaluation of perceptual quality (SRGAN [2] network).

## References

- [1] J. Kim, J. K. Lee, and K. M. Lee. Accurate image super-resolution using very deep convolutional networks. In *CVPR*, 2016. 1, 2
- [2] C. Ledig, L. Theis, F. Huszar, J. Caballero, A. Cunningham, A. Acosta, A. Aitken, A. Tejani, J. Totz, Z. Wang, and W. Shi. Photo-realistic single image super-resolution using a generative adversarial network. In *CVPR*, 2017. 1, 2, 3, 5
- [3] Chao Ma, Chih-Yuan Yang, Xiaokang Yang, and Ming-Hsuan Yang. Learning a no-reference quality metric for single-image super-resolution. *Computer Vision and Image Understanding*, 158:1–16, 2017. 1
- [4] Karen Simonyan and Andrew Zisserman. Very deep convolutional networks for large-scale image recognition. *arXiv preprint arXiv:1409.1556*, 2014. 1
- [5] Zhou Wang, A. C. Bovik, H. R. Sheikh, and E. P. Simoncelli. Image quality assessment: from error visibility to structural similarity. *IEEE Transactions on Image Processing*, 13(4):600–612, 2004. 1
- [6] Richard Zhang, Phillip Isola, Alexei A. Efros, Eli Shechtman, and Oliver Wang. The unreasonable effectiveness of deep features as a perceptual metric. In *CVPR*, 2018. 1

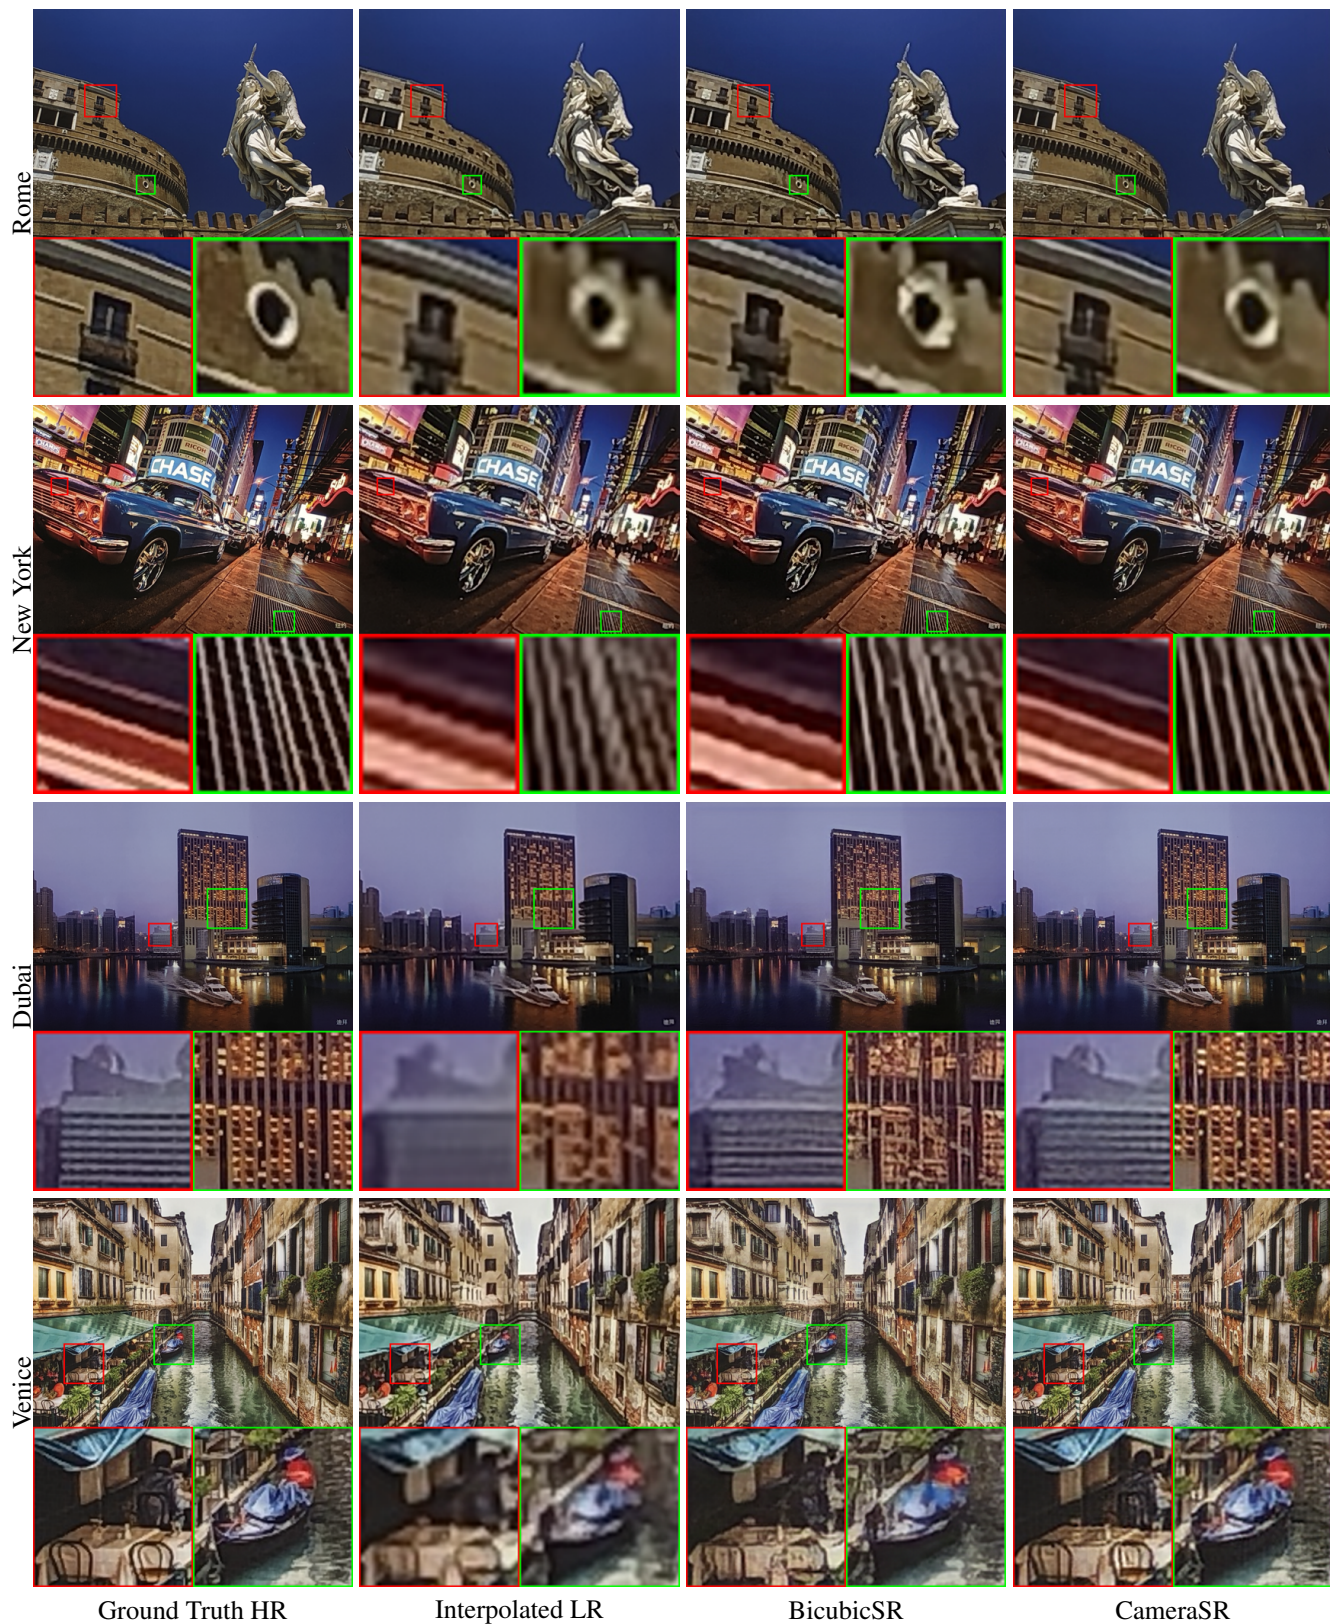

Figure 1. Visual comparison of SR results on the test images from the iPhone X version of City100, in terms of reconstruction accuracy (“Rome” and “New York”, VDSR [1] network) and perceptual quality (“Dubai” and “Venice”, SRGAN [2] network).



## 2. Generalizability from Nikon D5500 to Canon DSLR Cameras

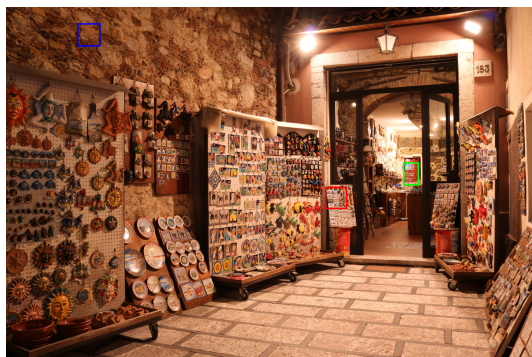

Canon EOS 750D (20mm, f/11.0, 2.00s)

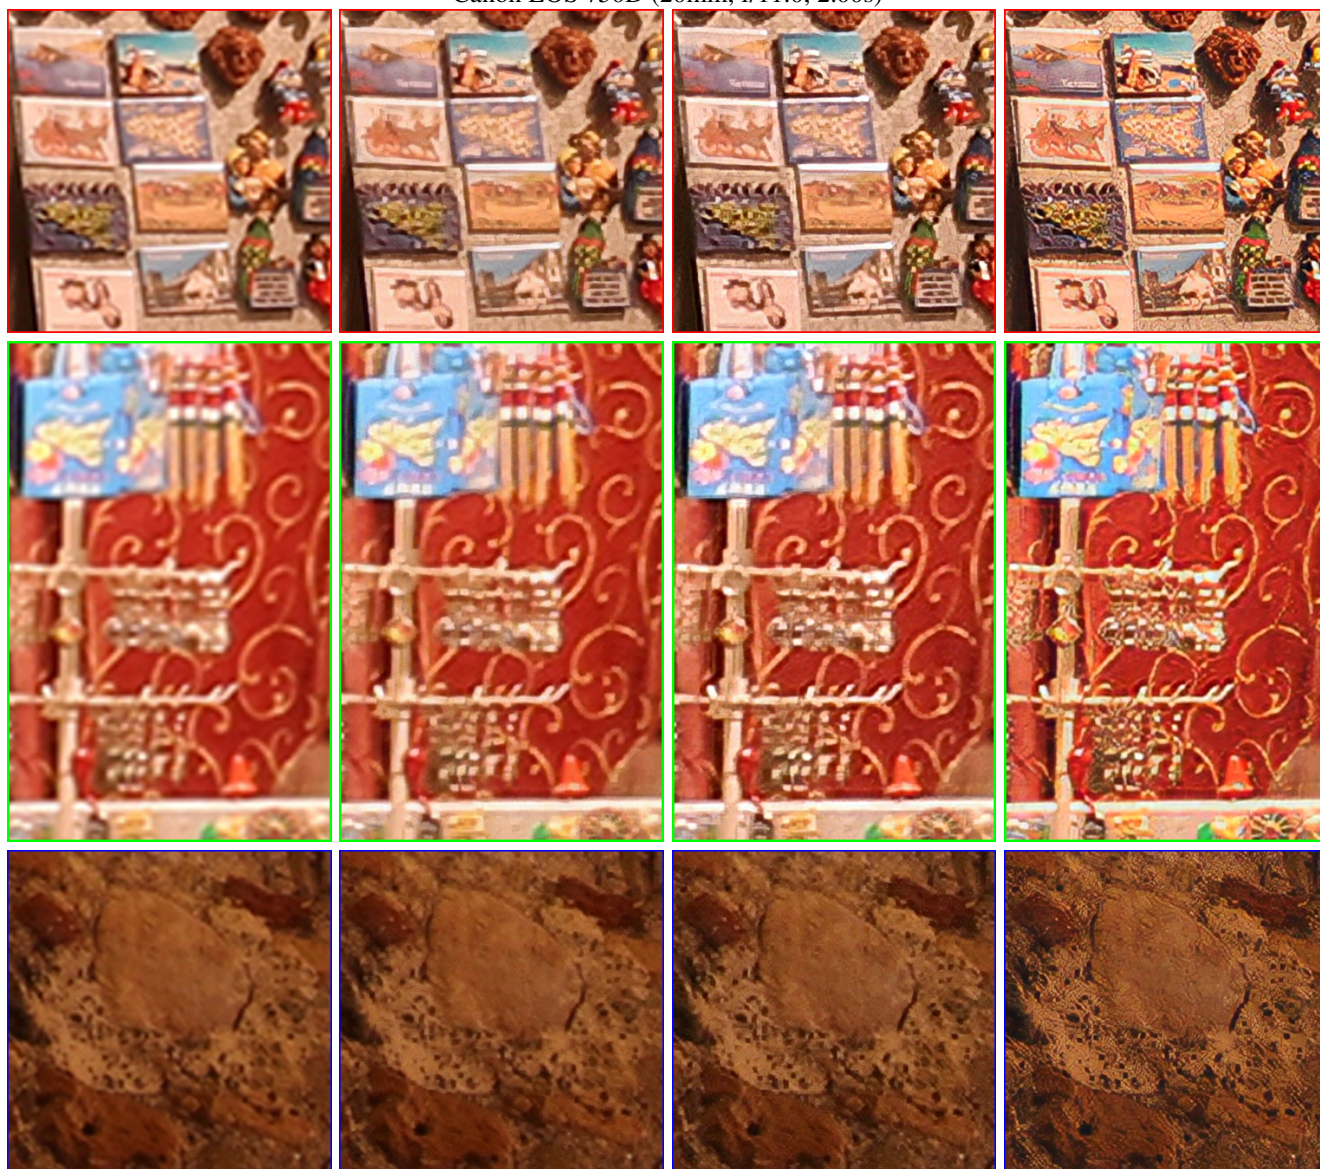

Interpolated LR

BicubicSR

GaussianSR

CameraSR

Figure 2. Visual comparison of SR results on an image captured by EOS 750D. Networks are trained on City100 using the SRGAN [2].



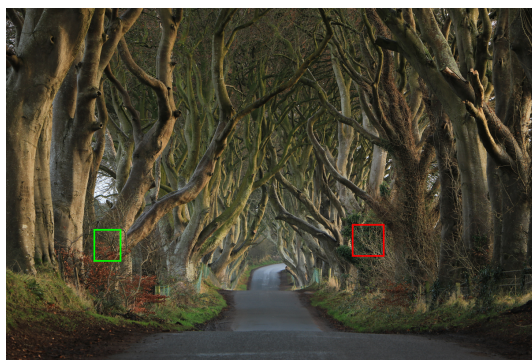

Canon EOS 760D (118mm, f/8.0, 1/20s)

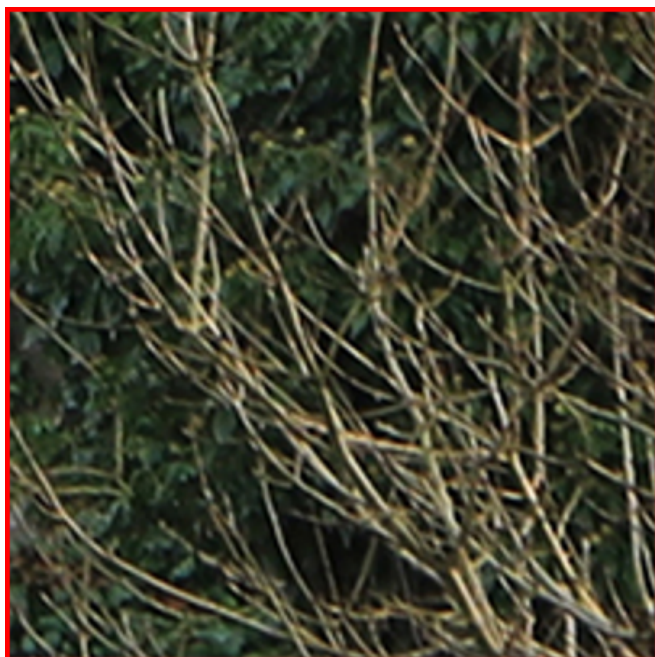

Interpolated LR

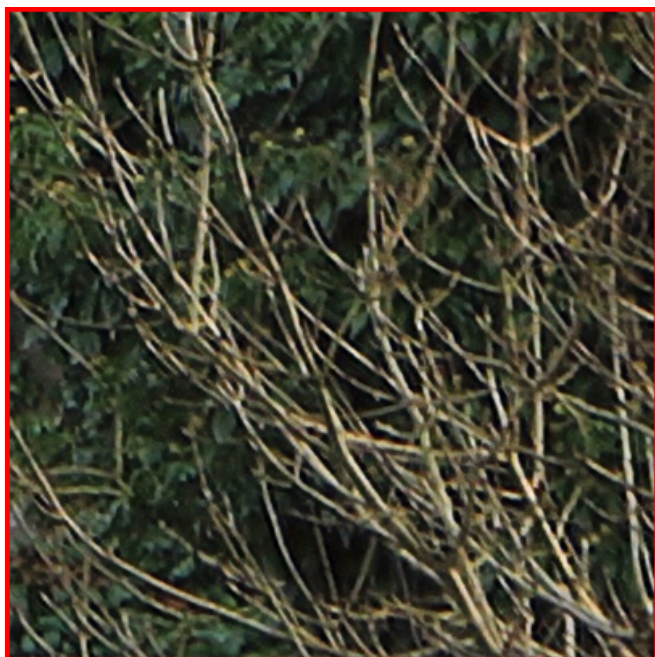

BicubicSR

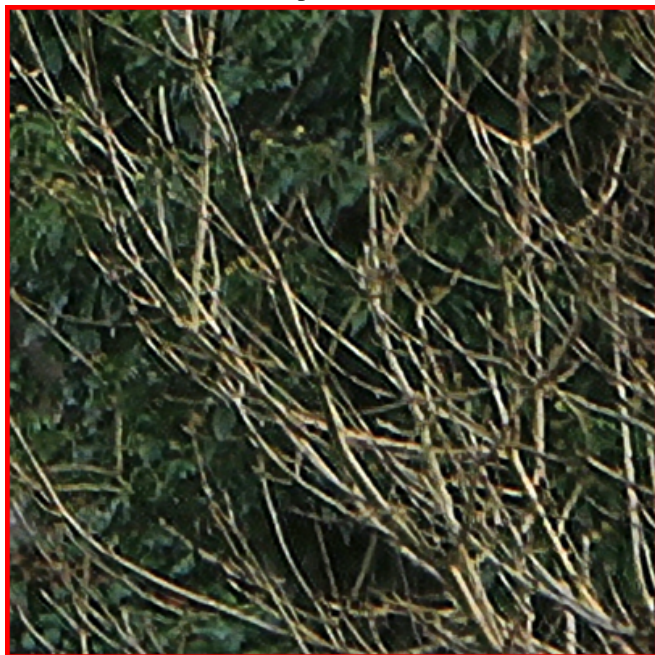

GaussianSR

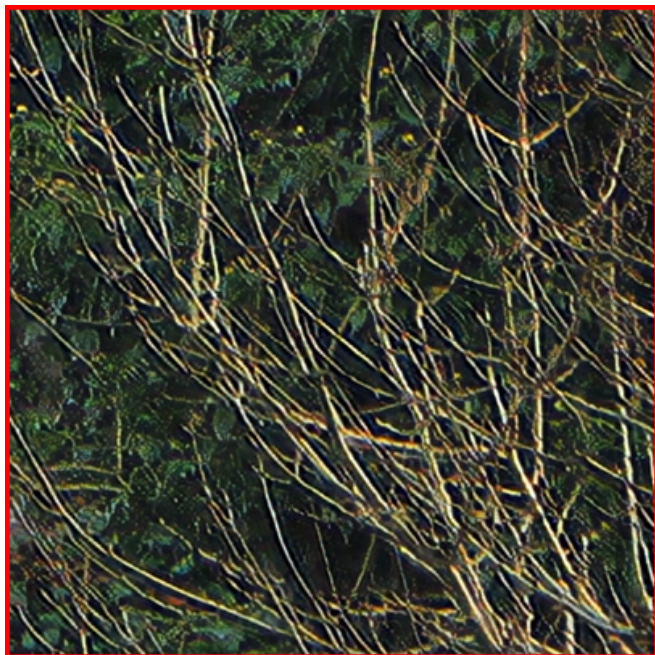

CameraSR



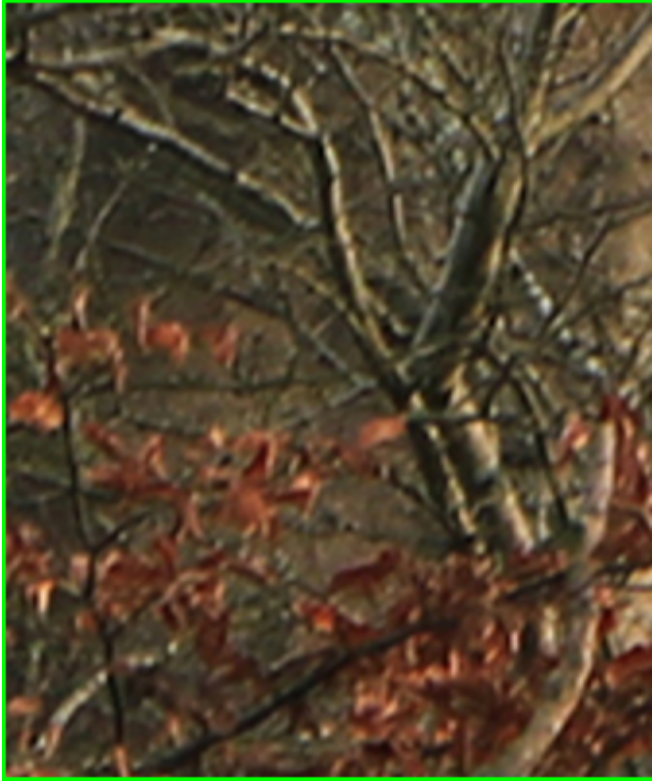

Interpolated LR

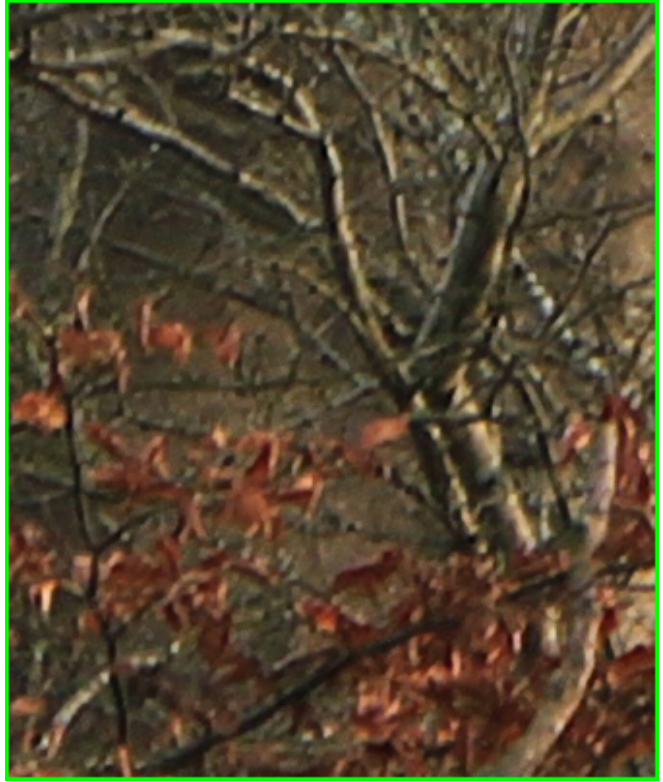

BicubicSR

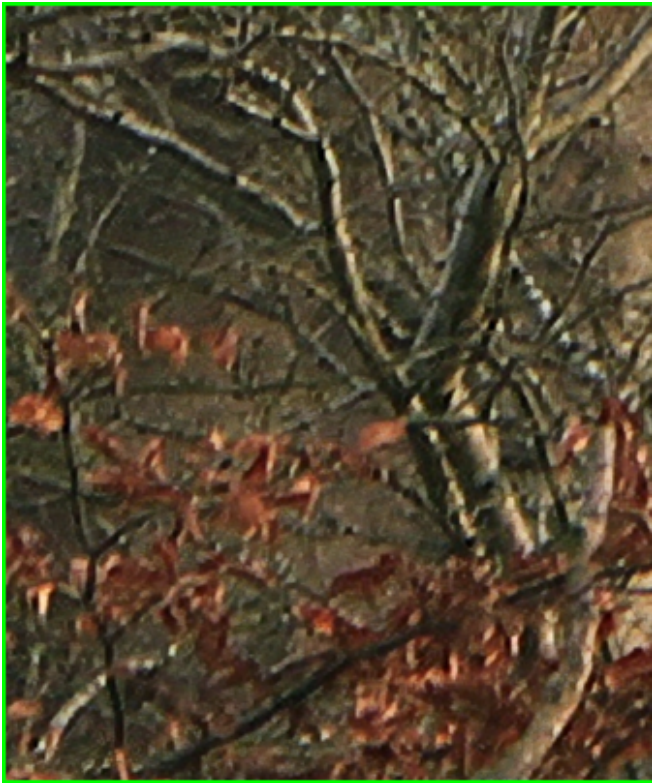

GaussianSR

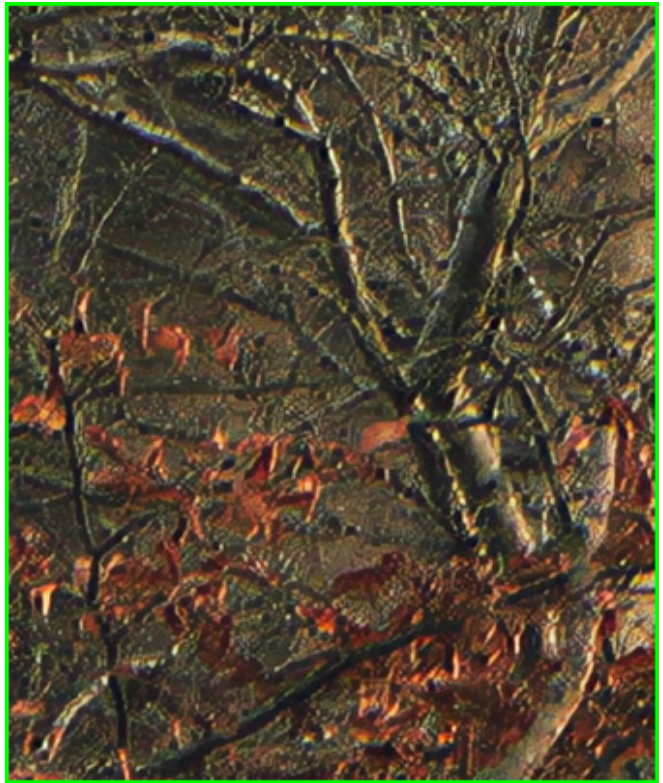

CameraSR

Figure 3. Visual comparison of SR results on an image captured by EOS 760D. Networks are trained on City100 using the SRGAN [2].



### 3. Overview of City100

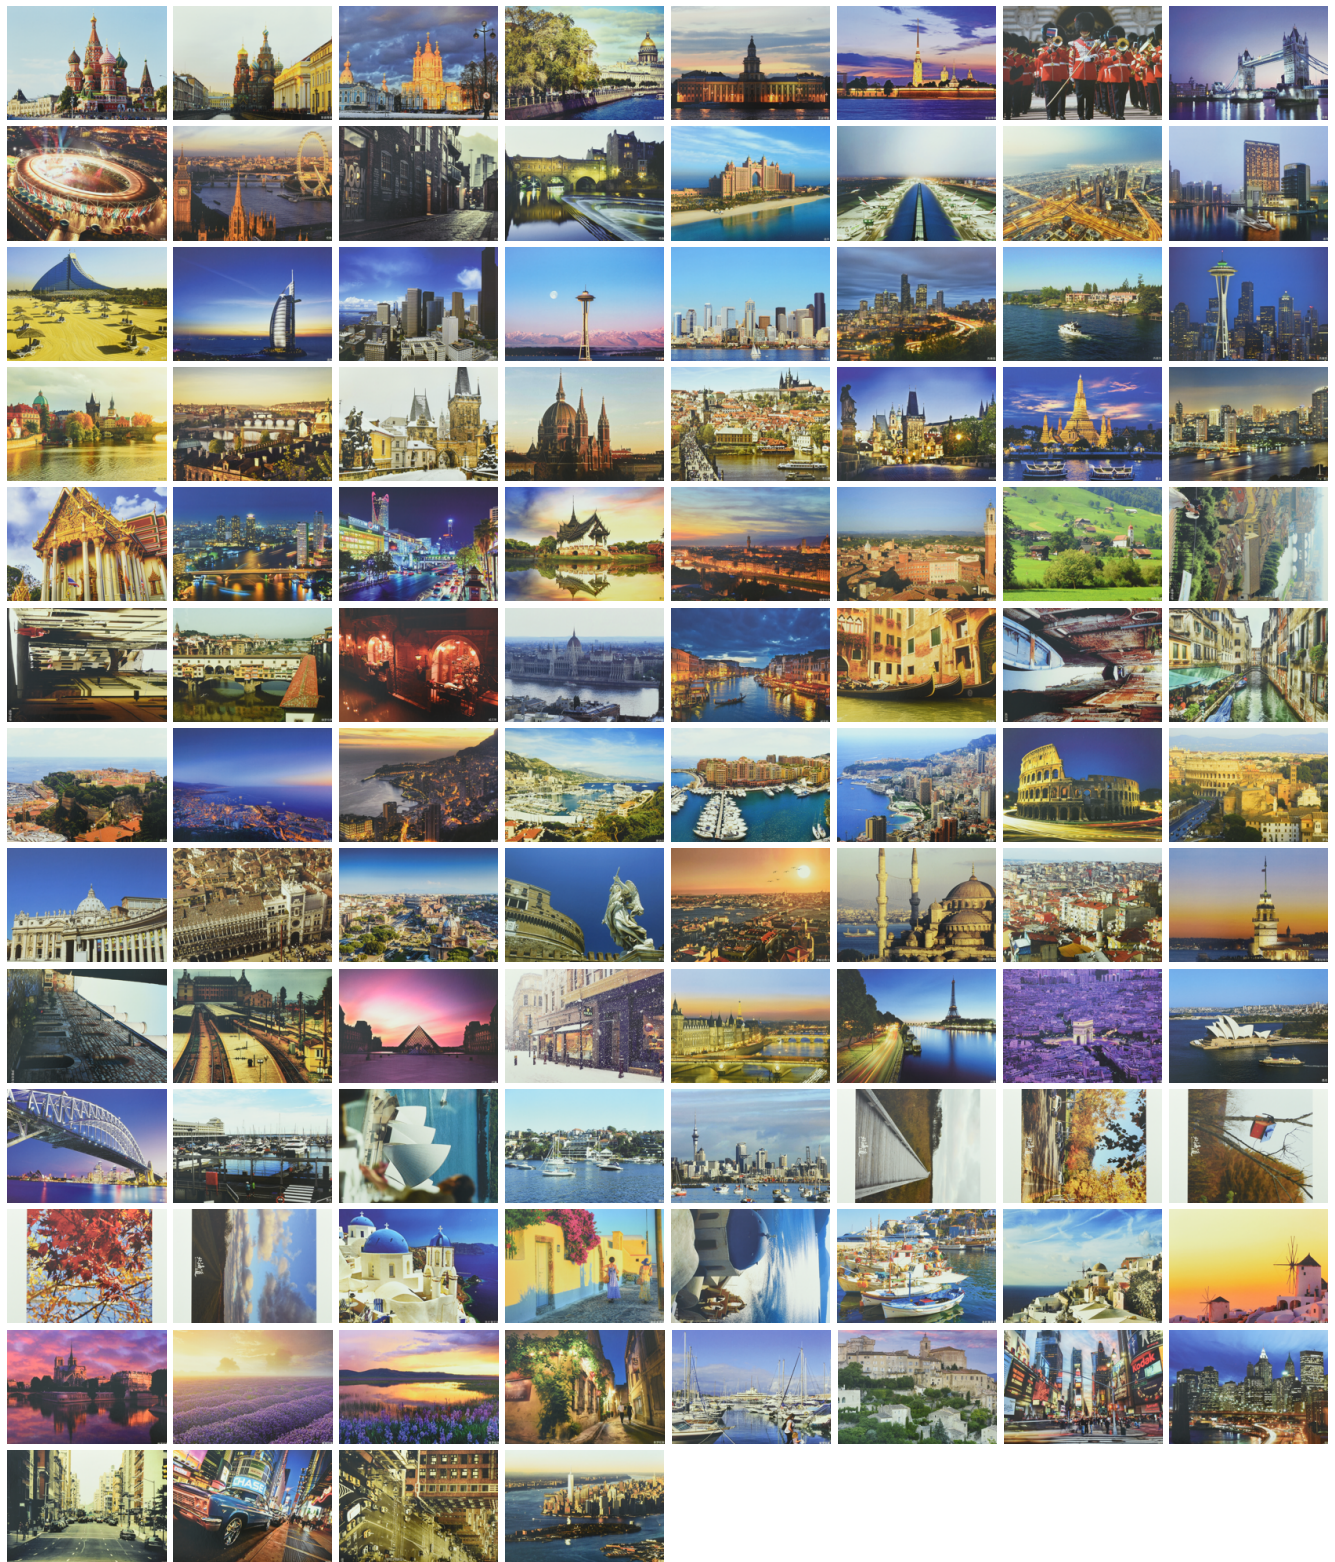

Figure 4. The overview of City100 content.
